# Supplementary material
Source: ML conference proceedings conference paper supplement (https://proceedings.mlr.press/v97/antelmi19a.html)
Supplement: Supplementary file [file antelmi19a-supp.pdf]

Supplementary Material

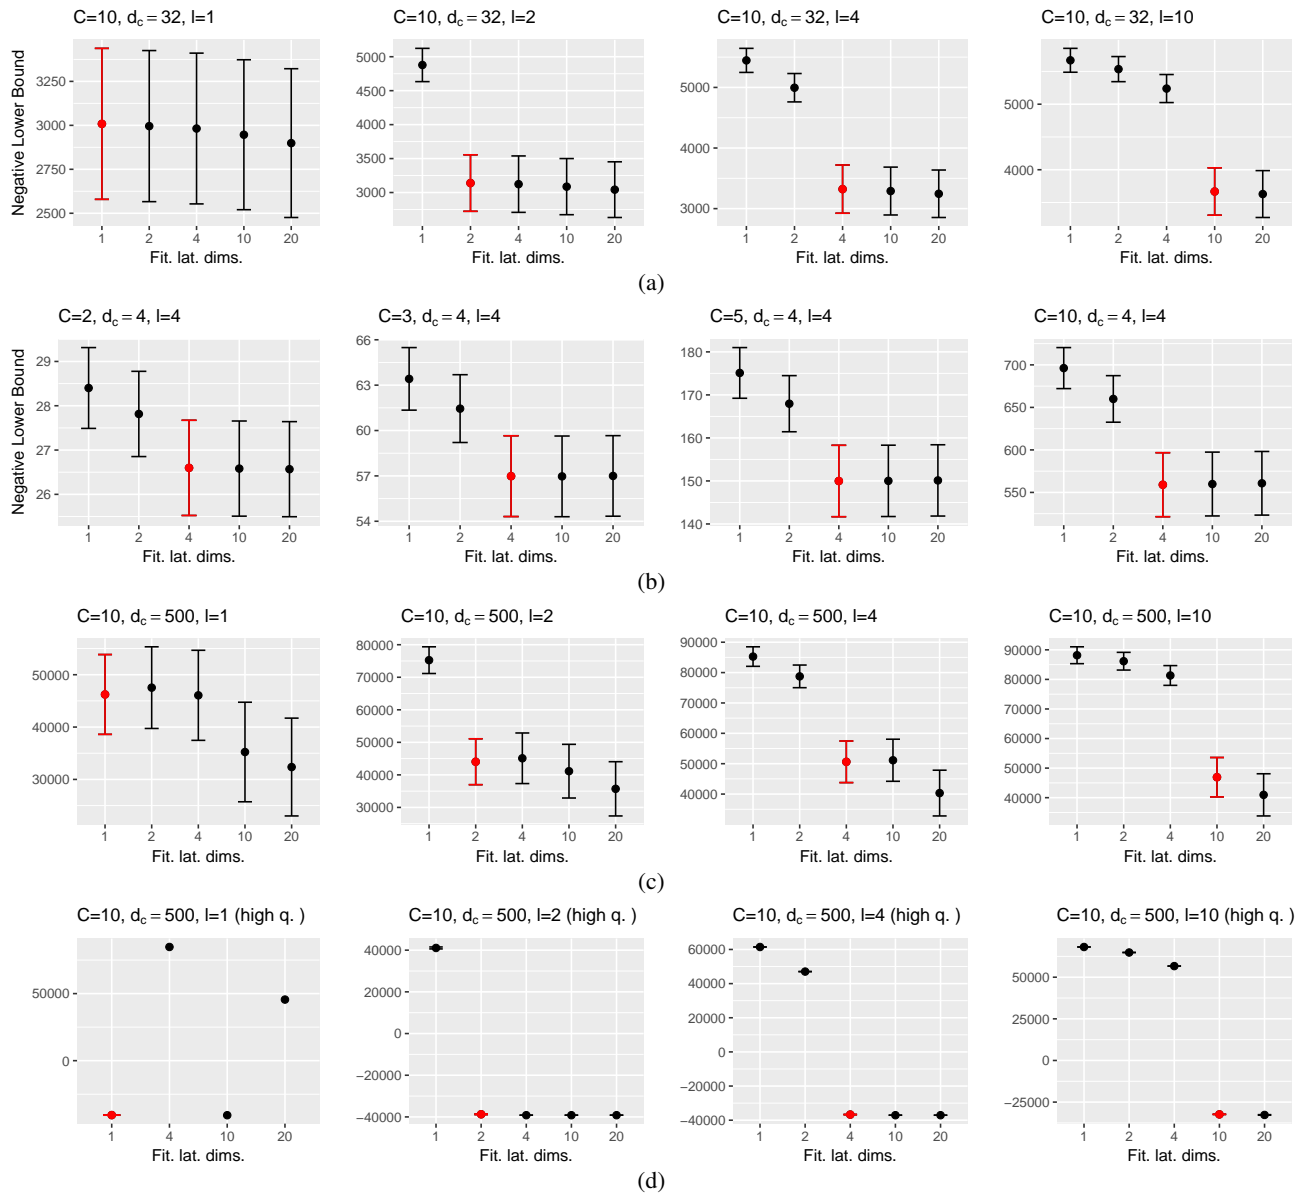

Figure S1: Negative lower bound (NLB) on the synthetic training set computed at convergence for all the scenarios. Each bar shows mean  $\pm$  std.err. of  $N = 80$  total experiments as a function of the number of fitted latent dimensions. Red bars represents experiments where the number of true and fitted latent dimensions coincide. (a) Experimental setup  $C = 10$ ,  $d_c = 32$ : NLB stops decreasing when the number of fitted latent dimension coincide with the generated ones; notable gap between the under-fitted and over-fitted experiments (elbow effect). (b) Experimental setup  $d_c = 4$ ,  $l = 4$ : increasing the number of channels  $C$  makes the elbow effect more pronounced. (c) Experimental setup  $C = 10$ ,  $d_c = 500$ : with high dimensional data ( $d_c = 500$ ) using the lower bound as a model selection criteria to assess the true number of latent dimensions may end up in overestimation. (d) Restricted ( $N = 5$  total experiments) high quality experimental setup  $C = 10$ ,  $d_c = 500$ ,  $S = 10000$ ,  $snr = 100$ : the risk to overestimate the true number of latent dimensions can be mitigated by increasing the  $snr$  and  $S$  of the observations in the dataset.

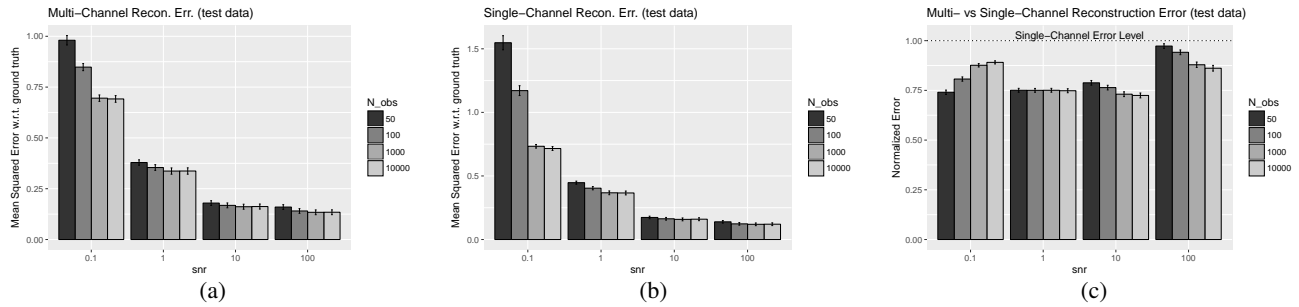

Figure S2: Reconstruction error on synthetic test data reconstructed with the multi-channel model. The reconstruction is better for high  $snr$  and high training data sample size. Scenarios were generated by varying one-at-a-time the dataset attributes listed in Tab. 1 for a total of 8 000 experiments. (a) Mean squared error from the ground truth test data using the Multi-Channel reconstruction:  $\hat{\mathbf{x}}_i = \mathbb{E}_c [\mathbb{E}_{q(\mathbf{z}|\mathbf{x}_c, \phi_c)} [p(\mathbf{x}_i|\mathbf{z}, \theta_i)]]$ . (b) Mean squared error from the ground truth test data using the Single-Channel reconstruction:  $\hat{\mathbf{x}}_i = \mathbb{E}_{q(\mathbf{z}|\mathbf{x}_i, \phi_i)} [p(\mathbf{x}_i|\mathbf{z}, \theta_i)]$ . (c) Ratio between Multi- vs Single-Channel reconstruction errors: we notice that the error made in ground truth data recovery with multi-channel information is systematically lower than the one obtained with a single-channel decoder.
